# Supplementary material for: Stoichiometry of chromatin-associated protein complexes revealed by label-free quantitative mass spectrometry-based proteomics
Source: PubMed Central journal article supplement — Nucleic Acids Res. 2012 Oct 12;41(1):e28. doi: 10.1093/nar/gks941 (PMC3592467; doi:10.1093/nar/gks941), 2012-10-12
Supplement: supp_gks941_nar-02216-h-2012-File006.pdf [file supp_gks941_nar-02216-h-2012-File006.pdf]

# Supplementary Figure 1

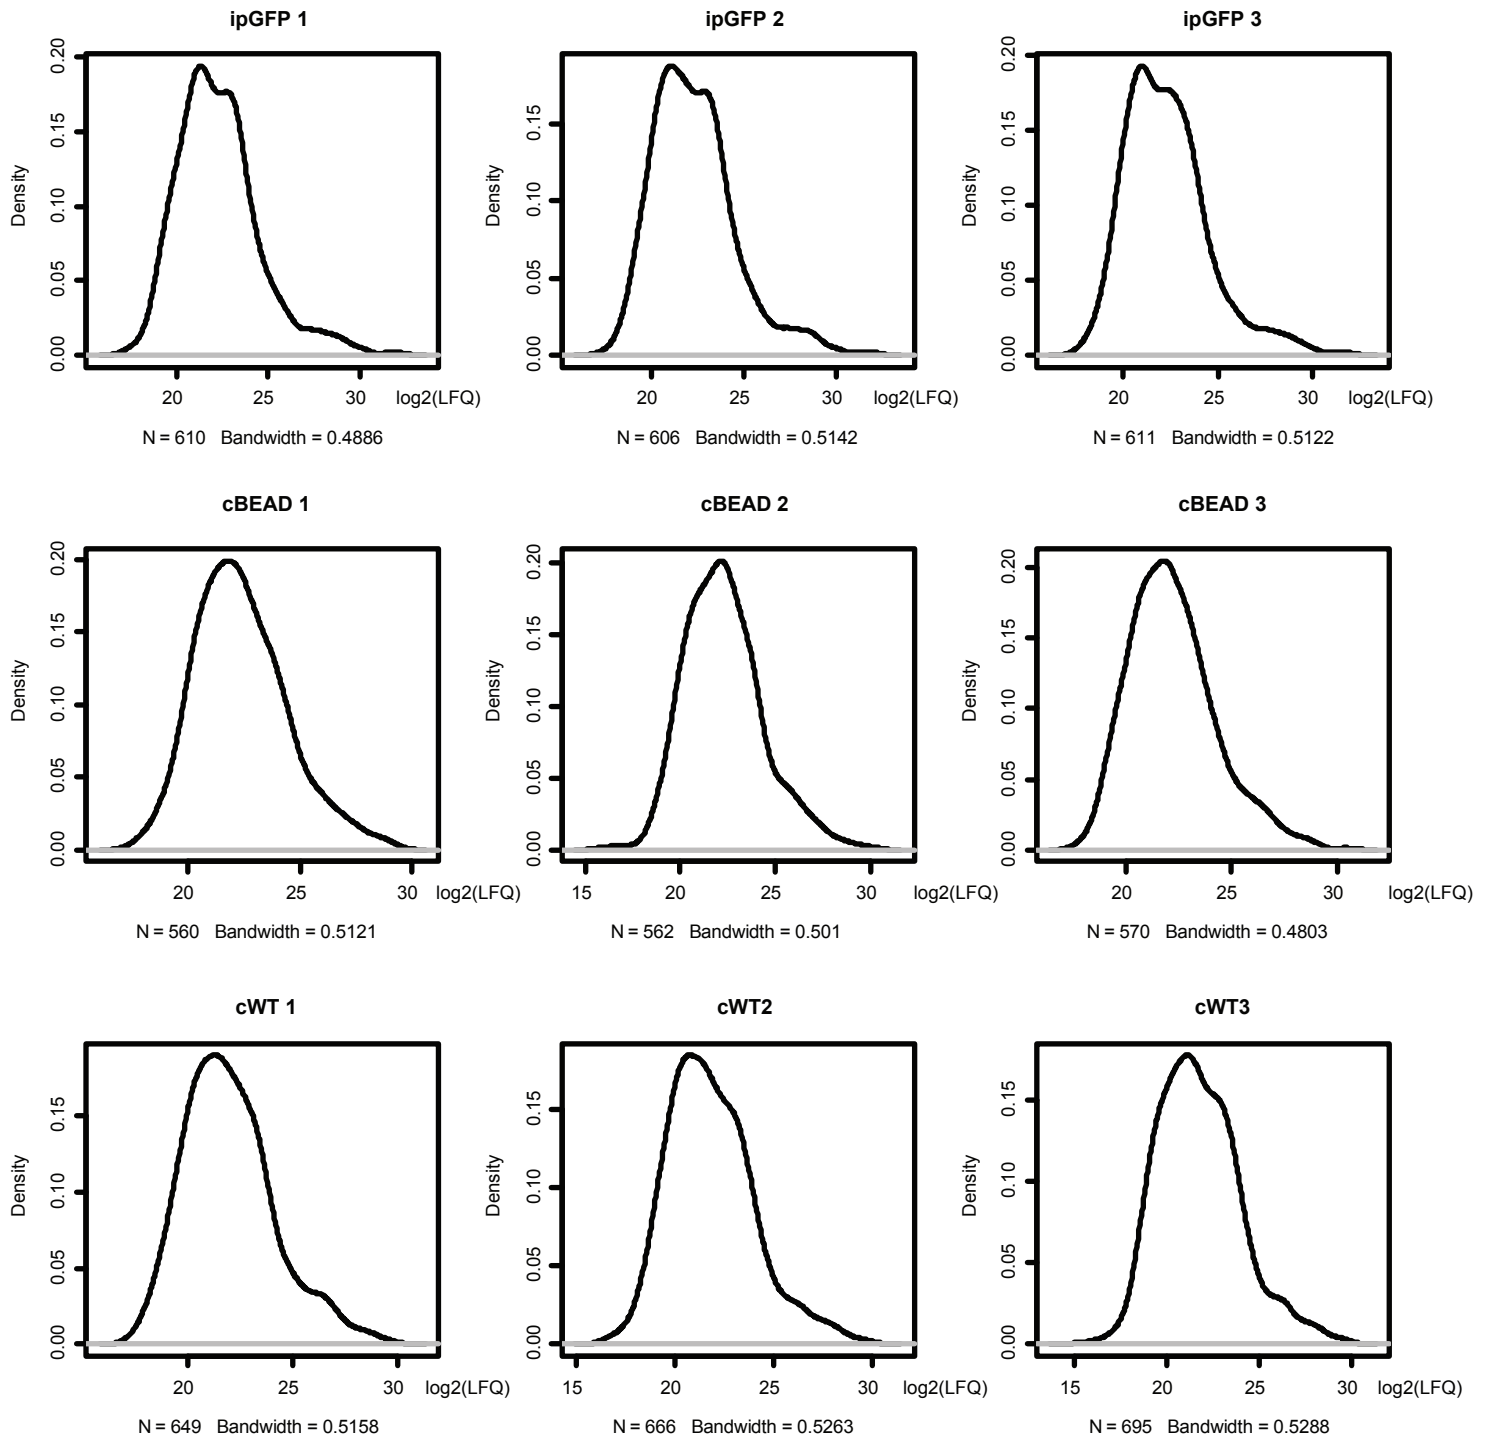

**Supplementary Figure 1.** Gaussian distribution of the LFQ intensities obtained in the affinity pull-downs in triplicate. Each of these pull-downs shows a normal distribution.
